# Supplementary material for: Fabrication of a heterostructural fibrillated collagen matrix for the regeneration of soft tissue function
Source: Royal Society of Chemistry journal article supplement (doi:10.1039/c1sm06543b), 2011-10-31
Supplement: c1sm06543b.pdf [file c1sm06543b.pdf]

## Supplementary Figures

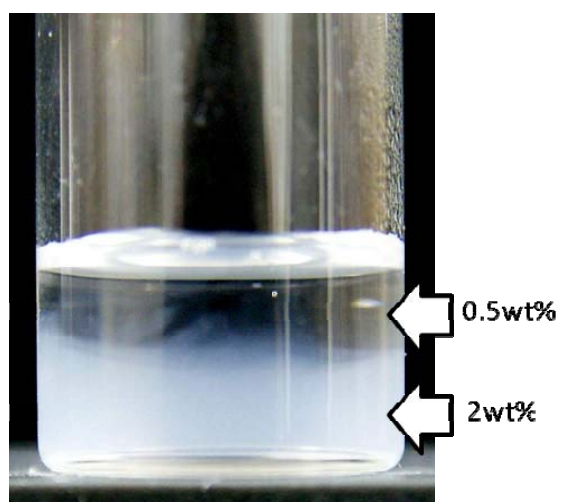

**Figure S1.** Deposition of the 0.5-wt% collagen aqueous solution onto the 2-wt% collagen aqueous solution.

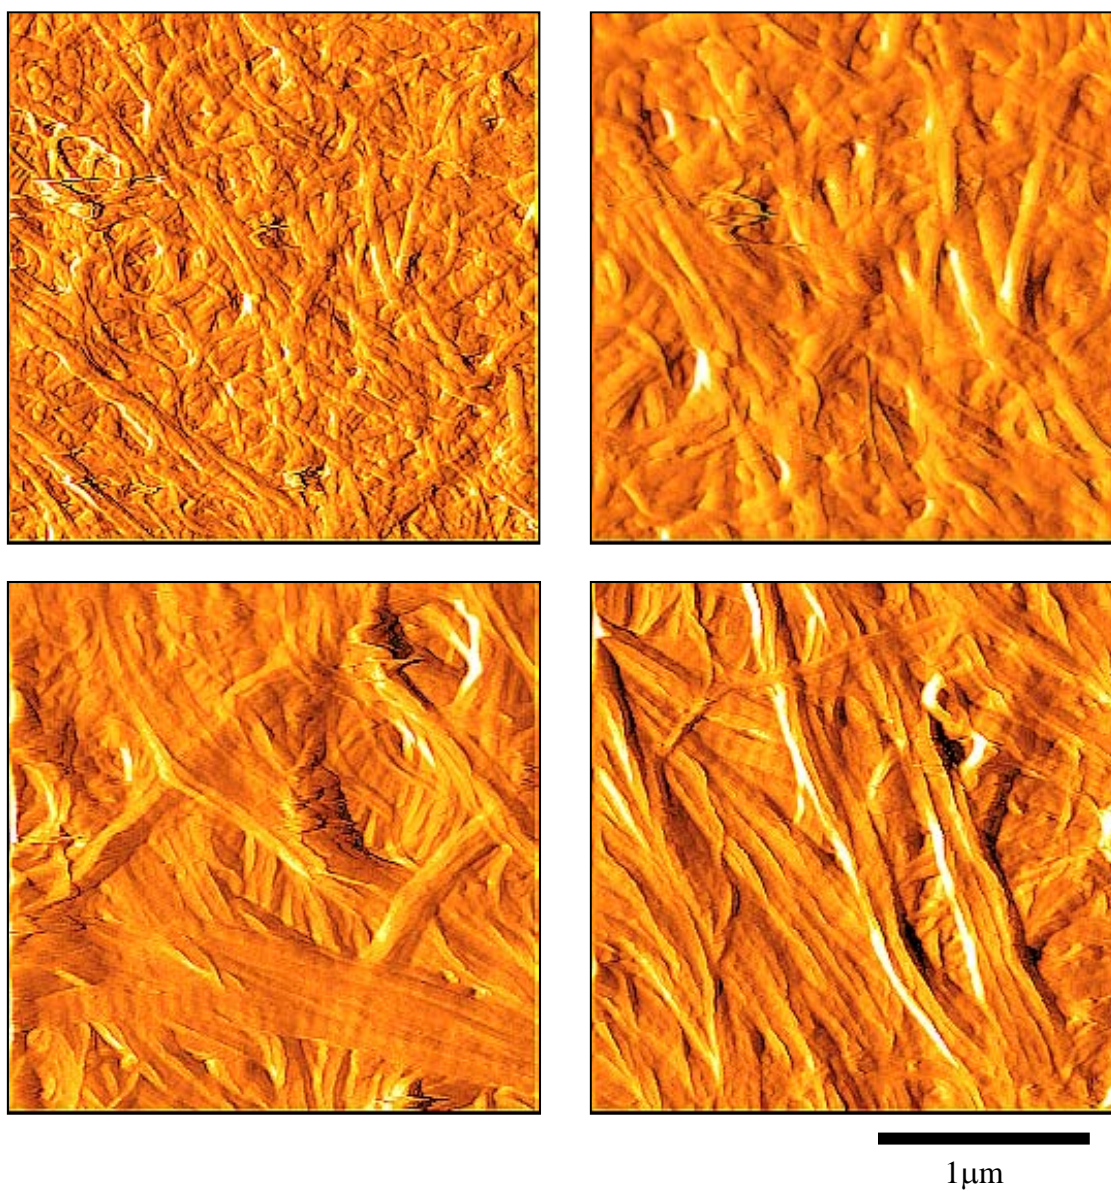

(a)

(b)

**Figure S2.** AFM images (deflection mode) of the collagen fibrils of the 2-wt% monolithic collagen matrix (a) and multi-layered collagen matrix (b). The upper images represent the sparse collagen layer and the below images represent the dense collagen layer.

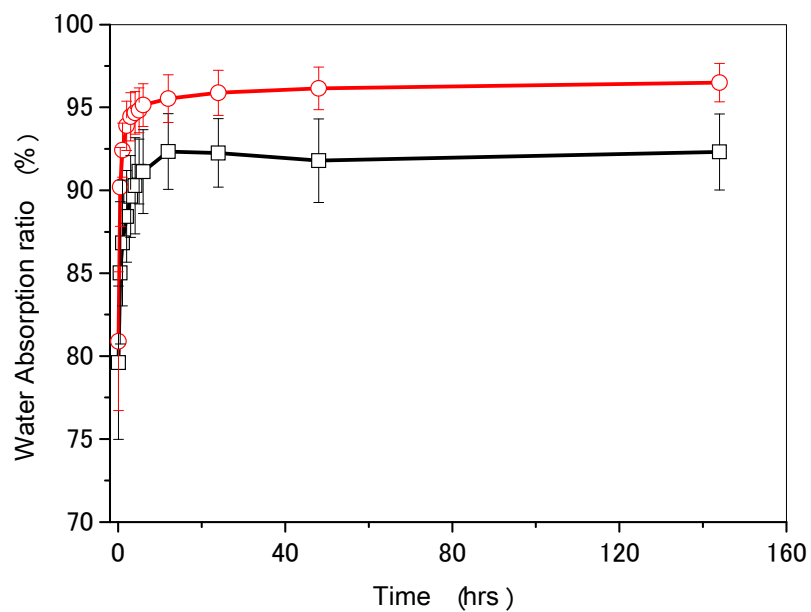

**Figure S3.** Water absorption ratio of the 0.5-wt% and 2-wt% monolithic collagen matrices.

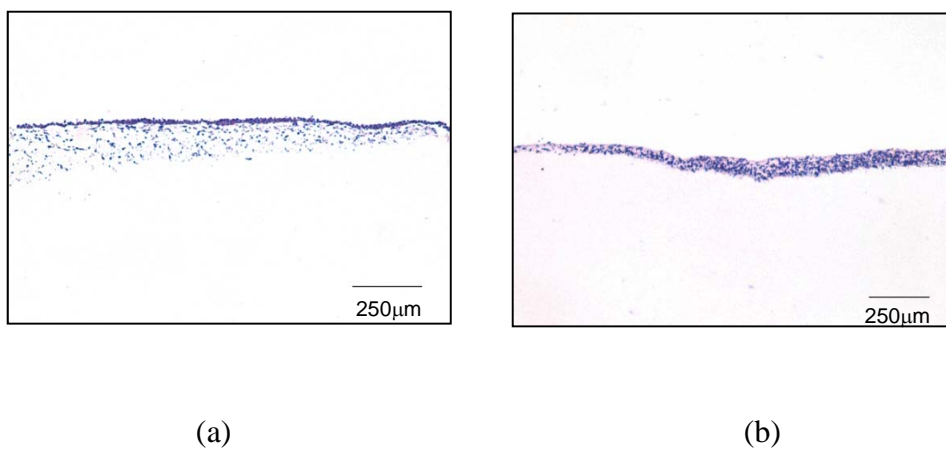

**Figure S4.** (a) L929 cells seeded on the upper (c) and lower (b) collagen layer of the 0.5-wt% collagen matrix. The depth of the cell infiltration was approximately 146 μm.
